# Supplementary material
Source: publisher site journal article supplement (https://www.dovepress.com/article/597676)
Supplement: Supplementary file 1 [file 597676.docx]

**APPENDIX**

**Appendix Table** **1 Information on drug resistance of nosocomial infection strains of Acinetobacter baumannii after colonization**

| Patient number | CAZ | IMI | SXT | CSL | FEP | TZP | LEV | MEM | MN | CS | TGC | AN | GM | AMS | NDM |
| --- | --- | --- | --- | --- | --- | --- | --- | --- | --- | --- | --- | --- | --- | --- | --- |
| 1 | ≥64 | ≥16 | ≥320 | ≥64 | ≥32 | ≥128 | 4 | ≥16 | 8 | ≤0.5 | ≤0.5 | 6(rad) | 6(rad) | 6(rad) | - |
| 2 | ≥64 | ≥16 | ≤20 | ≥64 | ≥32 | ≥128 | ≥8 | ≥16 | ≤1 | ≤0.5 | ≤0.5 | 12(rad) | 14(rad) | 6(rad) | - |
| 3 | ≥64 | ≥16 | ≥320 | 16 | 8 | ≥128 | ≥8 | ≥16 | 8 | ≤0.5 | ≤0.5 | 12(rad) | 14(rad) | 6(rad) | - |
| 4 | ≥64 | ≥16 | ≤20 | ≥64 | ≥32 | ≥128 | 4 | ≥16 | 8 | ≤0.5 | ≤0.5 | 6(rad) | 6(rad) | 6(rad) | - |
| 5 | ≥64 | ≥16 | ≤20 | ≥64 | ≥32 | ≥128 | ≥8 | ≥16 | 8 | ≤0.5 | ≤0.5 | 6(rad) | 6(rad) | 6(rad) | - |
| 6 | ≥64 | ≥16 | ≥320 | 8 | ≥32 | ≥128 | ≥8 | ≥16 | ≤1 | ≤0.5 | ≤0.5 | 20(rad) | 14(rad) | 13(rad) | - |
| 7 | ≥64 | ≥16 | ≥320 | ≥64 | ≥32 | ≥128 | ≥8 | ≥16 | 8 | ≤0.5 | 4 | 6(rad) | 6(rad) | 8(rad) | - |
| 8 | ≥64 | ≥16 | ≤20 | ≥64 | ≥32 | ≥128 | ≥8 | ≥16 | 8 | ≤0.5 | ≤0.5 | 6(rad) | 6(rad) | 6(rad) | - |
| 9 | ≥64 | ≥16 | ≤20 | ≥64 | ≥32 | ≥128 | ≥8 | ≥16 | ≤1 | ≤0.5 | ≤0.5 | 12(rad) | 14(rad) | 6(rad) | - |

CAZ, ceftazidime; IMI, imipenem; SXT, methotrexate-sulfamethoxazole; CSL, cefoperazone/sulbactam; FEP, cefepime; TZP, piperacillin/tazobactam; LEV, levofloxacin; MEM, meropenem; MN, minocycline; CS, bacteriocin; TGC, tigecycline; AN, gentamycin; GM, gentamycin; AMS, ampicillin/sulbactam; NDM, NDM-type carbapenemase; +,detected; -, not detected; /,not tested.

**Appendix Table 2 Information on drug resistance of nosocomial infection strains of Klebsiella pnenmonia after colonization**

| Patient number | ESBL | ETP | cz03 | CTR | azm | FEP | CAZ | TZP | AMS | IMI | SXT | LEV | GM | AN | CXM | AMC | FOX | CSL | MEM | NDM | KPC | CZA |
| --- | --- | --- | --- | --- | --- | --- | --- | --- | --- | --- | --- | --- | --- | --- | --- | --- | --- | --- | --- | --- | --- | --- |
| 1 | + | 4 | ≥64 | ≥64 | 16 | ≥32 | ≥32 | ≥128 | ≥32 | ≥16 | ≤20 | 2 | ≤1 | ≤2 | 6(rad) | 6(rad) | 6(rad) | 6(rad) | ≥16 | + | - | 14(rad) |
| 2 | + | 4 | ≥64 | ≥64 | 64 | ≥32 | ≥32 | ≥128 | ≥32 | ≥16 | ≤20 | ≥8 | ≤1 | ≤2 | 6(rad) | 6(rad) | 24(rad) | 6(rad) | ≥16 | - | + | 26(rad) |
| 3 | + | ≤0.5 | ≥64 | ≥64 | 64 | ≥32 | ≥32 | 4 | ≥32 | ≤1 | ≥320 | ≤0.25 | ≤1 | ≤2 | 6(rad) | 14(rad) | 24(rad) | 20(rad) | ≤1 | / | / | / |
| 4 | + | ≤0.5 | ≥64 | ≥64 | 64 | ≥32 | ≥32 | 4 | ≥32 | ≤1 | ≥320 | ≤0.25 | ≤1 | ≤2 | 6(rad) | / | 24(rad) | 20(rad) | ≤1 | / | / | / |

ESBL, extended-spectrum β-Lactamases; ETP, ertapenem; cz03, cefazolin; CTR, ceftriaxone; azm, aztreonam; CXM, cefuroxim; FOX, cefoxitin; KPC, KPC-type carbapenemase; CZA, ceftazidime/avibactam; +,detected; -, not detected; /,not tested.

**Appendix Table 3 Information on drug resistance of nosocomial infection strains of Escherichia coli (E. coli) after colonization**

| Patient number | DX | MN | azm | MEM | FEP | CAZ | TZP | IMI | SXT | LEV | AN | ETP | cz03 | CTR | AMS | GM | NDM | KPC | CZA | PB | TGC |
| --- | --- | --- | --- | --- | --- | --- | --- | --- | --- | --- | --- | --- | --- | --- | --- | --- | --- | --- | --- | --- | --- |
| 1 | ≥16 | ≥16 | ≥64 | ≥16 | ≥32 | 14(rad) | ≥128 | ≥16 | ≥320 | ≥8 | ≤2 | ≥8 | 6(rad) | ≥64 | ≥64 | ≥64 | + | - | 14(rad) | 0.5 | 1 |
| 2 | ≥16 | ≥16 | ≥64 | ≥16 | ≥32 | 14(rad) | ≥128 | ≥16 | ≥320 | ≥8 | ≤2 | ≥8 | 6(rad) | ≥64 | ≥64 | ≥64 | + | - | 14(rad) | 0.5 | 1 |

DX, doxycycline; PB, polymyxin B；+,detected; -, not detected; /,not tested.
